# Supplementary material
Source: PubMed Central journal article supplement (PMC3725109)
Supplement: 1309947110_pnas.201309947SI.pdf [file 1309947110_pnas.201309947SI.pdf]

# Supporting Information

Baker et al. 10.1073/pnas.1309947110

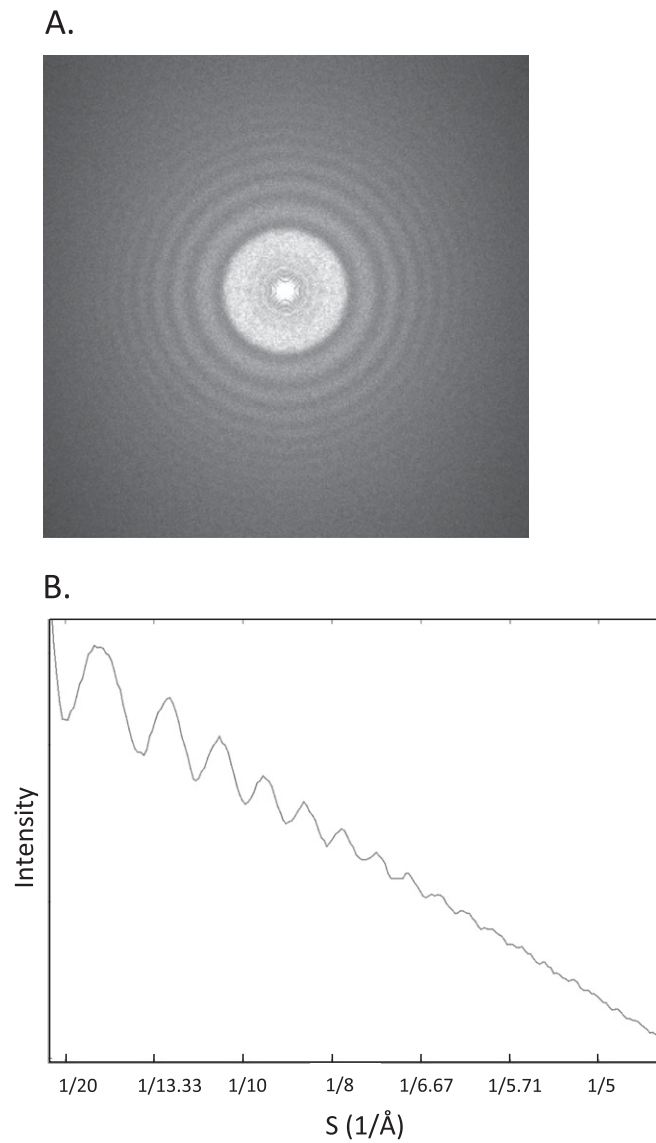

**Fig. S1.** Image quality assessment. (A) 2D average power spectra of  $\approx 15$  particles in a micrograph. (B) 1D rotational average of (A) showing signal beyond 5  $\text{\AA}$  resolution.









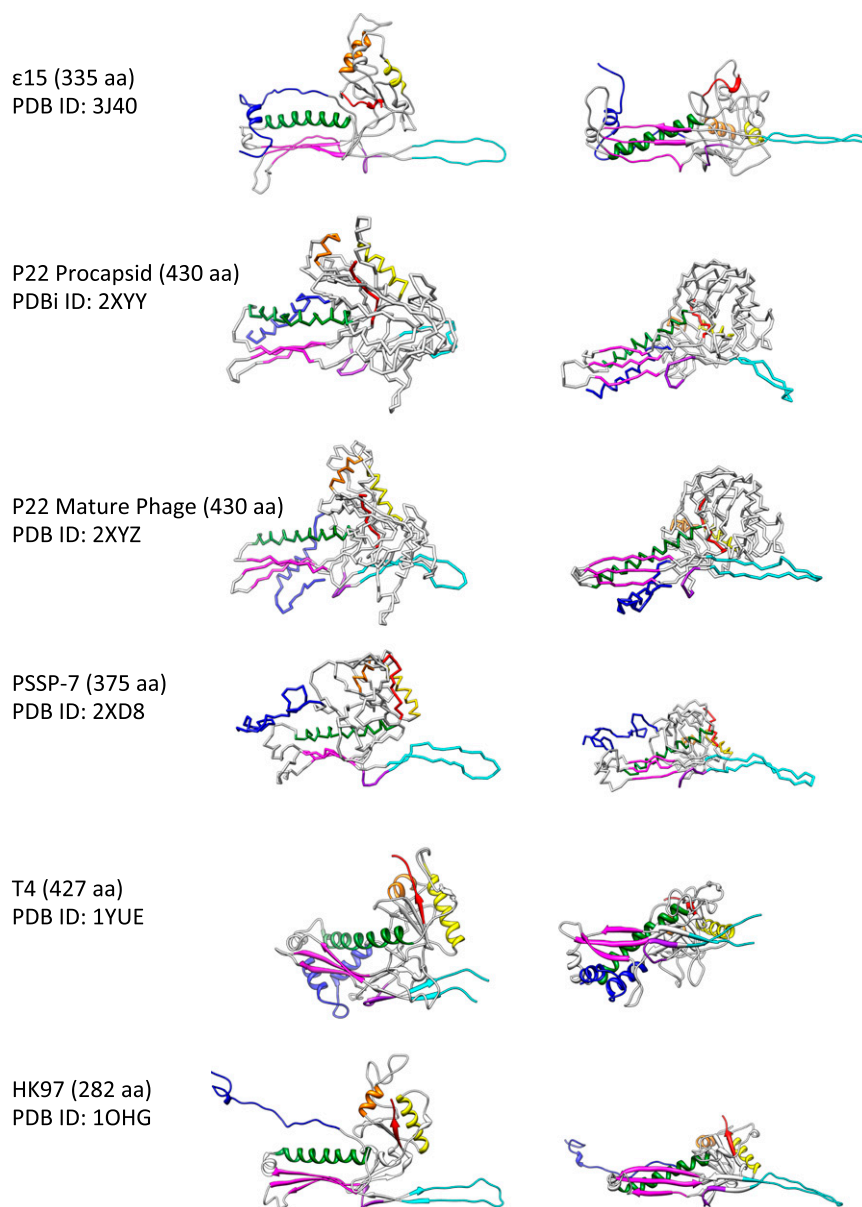

**Fig. S6.** Structural homologs of gp7. Two views of bacteriophage capsid protein structures are shown, colored by their functional domains. These functional domains are shown in Fig. 2B.

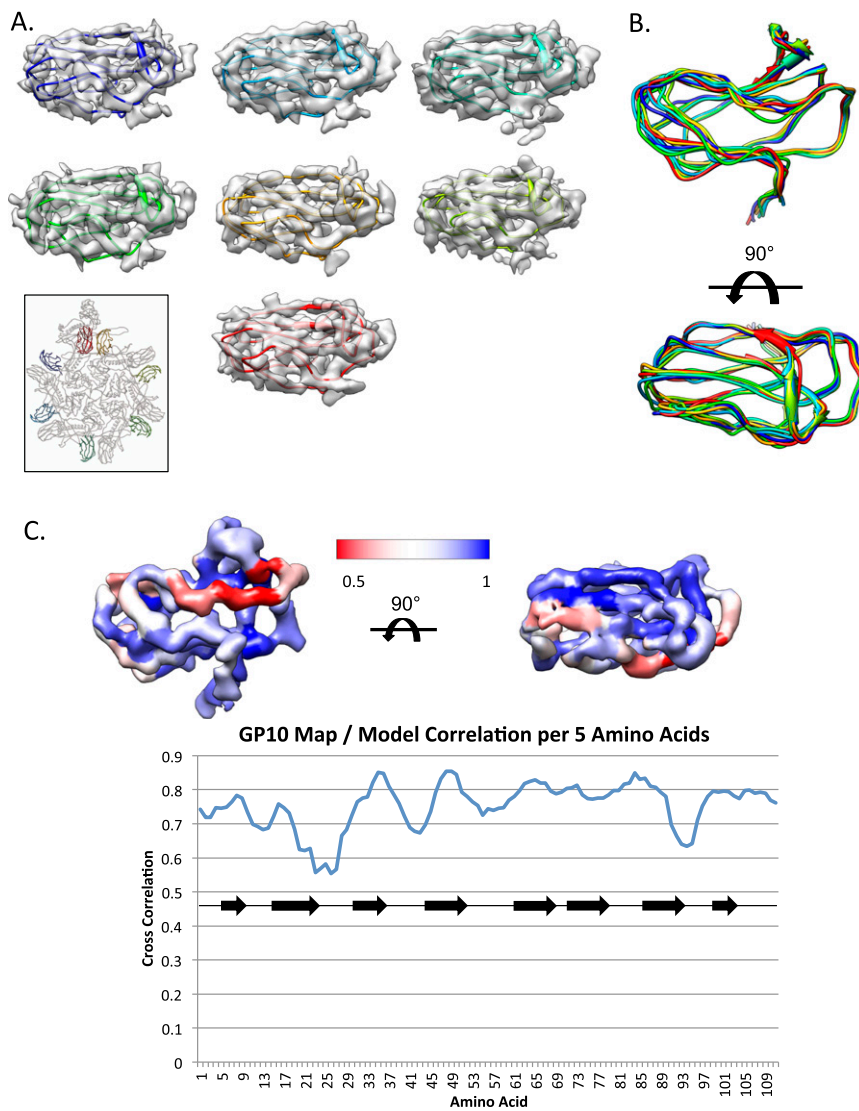

**Fig. S7.** Structure of gp10. (A) Seven individual gp10 subunits from an asymmetric unit are shown with the corresponding density. (B) Two views of the seven gp10 subunits are shown superimposed. (C) The average density map and model correlation (five amino acids window) for gp10 is shown. The correlation values are mapped on to the density map (Left), where red indicates poor correlation and blue indicates good correlation. These values are shown in the plot on the right.







Table S1. Cont.

| Chain  | Z   | rmsd | lali | Nres  | %id | Description                                       |
|--------|-----|------|------|-------|-----|---------------------------------------------------|
| 1wme-A | 4.1 | 3.4  | 94   | 434   | 5   | PROTEASE                                          |
| 4acq-A | 4.1 | 3.6  | 85   | 1,270 | 6   | ALPHA-2-MACROGLOBULIN                             |
| 1k5m-A | 4.1 | 3.6  | 89   | 283   | 7   | COAT PROTEIN VP1 (P1D)                            |
| 2jd9-A | 4.1 | 3.6  | 87   | 139   | 2   | YEGBM32                                           |
| 3km5-B | 4   | 2.8  | 90   | 173   | 10  | LYSINE SPECIFIC CYSTEINE PROTEASE                 |
| 1ule-B | 4   | 2.9  | 85   | 150   | 2   | GALECTIN-2                                        |
| 3nap-C | 4   | 3    | 94   | 276   | 5   | CAPSID PROTEIN                                    |
| 2w87-B | 4   | 3    | 87   | 138   | 11  | ESTERASE D                                        |
| 2ygm-A | 4   | 3.1  | 91   | 351   | 5   | BLOOD GROUP A-AND B-CLEAVING ENDO-BETA-GALACTOSID |
| 2vng-B | 4   | 3.1  | 90   | 173   | 10  | CPE0329                                           |
| 4d8m-A | 4   | 3.4  | 95   | 585   | 6   | PESTICIDAL CRYSTAL PROTEIN CRY5BA                 |
| 4aw7-A | 4   | 3.5  | 86   | 565   | 2   | GH86A BETA-PORPHYRANASE                           |
| 2zs6-B | 4   | 3.6  | 83   | 420   | 6   | HEMAGGLUTININ COMPONENTS HA3                      |
| 1c3h-E | 3.9 | 2.6  | 81   | 137   | 10  | 30 KD ADIPOCYTE COMPLEMENT-RELATED PROTEIN        |
| 2qfe-A | 3.9 | 3    | 84   | 139   | 2   | CALPAIN-7                                         |
| 1fpn-3 | 3.9 | 3.1  | 93   | 237   | 4   | COAT PROTEIN VP1                                  |
| 2w47-A | 3.9 | 3.2  | 83   | 135   | 11  | LIPOLYTIC ENZYME, G-D-S-L                         |
| 3k75-B | 3.9 | 3.3  | 84   | 151   | 6   | DNA REPAIR PROTEIN XRCC1                          |
| 1hn0-A | 3.9 | 3.4  | 91   | 971   | 7   | CHONDROITIN ABC LYASEI                            |
| 3km9-B | 3.9 | 3.4  | 83   | 1,459 | 11  | COMPLEMENT C5                                     |
| 1gr3-A | 3.8 | 2.8  | 81   | 132   | 7   | COLLAGEN X                                        |
| 1o91-A | 3.8 | 2.9  | 82   | 131   | 5   | COLLAGEN ALPHA 1(VIII) CHAIN                      |
| 2vtx-D | 3.8 | 3    | 75   | 89    | 4   | NPM-A PROTEIN                                     |
| 1b35-C | 3.8 | 3    | 93   | 282   | 5   | PROTEIN (CRICKET PARALYSIS VIRUS, VP1)            |
| 4bcu-A | 3.8 | 3.1  | 90   | 188   | 9   | COAT PROTEIN                                      |
| 2w91-A | 3.8 | 3.1  | 93   | 635   | 10  | ENDO-BETA-N-ACETYLGLUCOSAMINIDASE D               |
| 3jr0-A | 3.8 | 3.1  | 85   | 156   | 6   | GENE 9 PROTEIN                                    |
| 1w8x-N | 3.8 | 3.2  | 81   | 114   | 7   | MAJOR CAPSID PROTEIN(PROTEIN P3)                  |
| 2buk-A | 3.8 | 3.4  | 91   | 184   | 8   | COAT PROTEIN                                      |
| 1ciy-A | 3.8 | 3.5  | 89   | 577   | 4   | CRYIA(A)                                          |
| 2cdo-A | 3.8 | 3.6  | 81   | 138   | 10  | BETA-AGARASE 1                                    |
| 3cih-A | 3.8 | 3.7  | 85   | 714   | 7   | PUTATIVE ALPHA-RHAMNOSIDASE                       |
| 3g6j-B | 3.8 | 4.2  | 86   | 903   | 5   | COMPLEMENT C3 BETA CHAIN                          |
| 2wq4-A | 3.7 | 2.7  | 82   | 134   | 11  | LECTIN                                            |
| 2wdb-A | 3.7 | 2.9  | 83   | 139   | 6   | HYALURONOGLUCOSAMINIDASE                          |
| 2k46-A | 3.7 | 3.2  | 90   | 190   | 4   | MGC80075 PROTEIN                                  |
| 3afk-A | 3.7 | 3.3  | 84   | 168   | 2   | ANTI-TUMOR LECTIN                                 |
| 1u5i-A | 3.7 | 3.3  | 94   | 625   | 2   | CALPAIN 2, LARGE [CATALYTIC] SUBUNIT PRECURSOR    |
| 2w3j-A | 3.7 | 3.3  | 83   | 137   | 5   | CARBOHYDRATE BINDINGMODULE                        |
| 1d4m-1 | 3.7 | 3.3  | 90   | 284   | 4   | PROTEIN (COXSACKIEVIRUS A9)                       |
| 1zba-2 | 3.7 | 3.4  | 95   | 207   | 14  | COAT PROTEIN VP1                                  |
| 2vzp-B | 3.7 | 3.4  | 86   | 127   | 7   | EXO-BETA-D-GLUCOSAMINIDASE                        |
| 1aym-1 | 3.7 | 3.4  | 90   | 285   | 6   | HUMAN RHINOVIRUS 16 COAT PROTEIN                  |
| 1qxp-B | 3.7 | 3.4  | 97   | 788   | 8   | MU-LIKE CALPAIN                                   |
| 2v5d-A | 3.7 | 3.4  | 89   | 722   | 4   | O-GLCNACASE NAGJ                                  |
| 3rjr-C | 3.7 | 3.5  | 91   | 343   | 9   | TRANSFORMING GROWTH FACTOR BETA-1                 |
| 2quo-A | 3.7 | 3.6  | 85   | 123   | 1   | HEAT-LABILE ENTEROTOXIN B CHAIN                   |
| 1dlc-A | 3.7 | 3.7  | 89   | 584   | 7   | DELTA-ENDOTOXIN CRYIIIA                           |
| 1ddl-A | 3.7 | 3.8  | 91   | 188   | 5   | RNA (5'-R(P*UP*UP*UP*UP*UP*U)-3')                 |
| 2obe-A | 3.7 | 3.9  | 88   | 915   | 1   | HEXON                                             |
| 2xom-A | 3.6 | 3    | 83   | 145   | 10  | ARABINO GALACTAN ENDO-1,4-BETA-GALACTOSIDASE      |
| 1df0-A | 3.6 | 3.1  | 90   | 624   | 2   | M-CALPAIN                                         |
| 4gh4-B | 3.6 | 3.4  | 94   | 207   | 13  | CAPSID PROTEIN VP1                                |
| 1gqp-B | 3.6 | 3.4  | 95   | 188   | 5   | DOC1/APC10                                        |
| 3pof-B | 3.6 | 3.4  | 77   | 114   | 6   | MANNAN-BINDING LECTIN SERINE PROTEASE 1           |
| 2p1b-A | 3.6 | 3.4  | 76   | 100   | 4   | NUCLEOPHOSMIN                                     |
| 1wmx-B | 3.6 | 3.5  | 94   | 195   | 7   | COG3291; FOG: PKD REPEAT                          |
| 3toj-B | 3.6 | 3.7  | 93   | 197   | 5   | SET1/ASH2 HISTONE METHYLTRANSFERASE COMPLEX SUBUN |
| 1wck-A | 3.5 | 2.8  | 77   | 136   | 6   | BCLA PROTEIN                                      |
| 1gmm-A | 3.5 | 2.9  | 78   | 126   | 6   | CBM6                                              |
| 2qdn-A | 3.5 | 2.9  | 81   | 123   | 10  | GITR LIGAND                                       |
| 1iqa-A | 3.5 | 2.9  | 85   | 156   | 11  | RECEPTOR ACTIVATOR OF NUCLEAR FACTOR KAPPA B      |

Table S1. Cont.

| Chain  | Z   | rmsd | lali | Nres  | %id | Description                                        |
|--------|-----|------|------|-------|-----|----------------------------------------------------|
| 1rj7-F | 3.5 | 3    | 85   | 144   | 9   | ECTODYSPLASIN A                                    |
| 1c28-A | 3.5 | 3    | 81   | 123   | 4   | PROTEIN (30 KD ADIPOCYTE COMPLEMENT-RELATED        |
| 2qe3-A | 3.5 | 3    | 85   | 140   | 5   | TNF SUPERFAMILY LIGAND TL1A                        |
| 1sfp-A | 3.5 | 3.1  | 76   | 111   | 9   | ASFP                                               |
| 1nt0-A | 3.5 | 3.1  | 78   | 257   | 5   | MANNOSE-BINDING PROTEIN ASSOCIATED SERINE PROTEAS  |
| 3jyb-A | 3.5 | 3.1  | 81   | 138   | 2   | SENSOR PROTEIN                                     |
| 1dg6-A | 3.5 | 3.2  | 87   | 149   | 6   | APO2L/TNF-RELATED APOPTOSIS INDUCING LIGAND (TRAIL |
| 1wky-A | 3.5 | 3.2  | 86   | 446   | 5   | ENDO-BETA-1,4-MANNANASE                            |
| 2v24-A | 3.5 | 3.2  | 91   | 197   | 3   | SPRY DOMAIN-CONTAINING SOCS BOX PROTEIN 4          |
| 1a6c-A | 3.5 | 3.2  | 88   | 513   | 7   | TOBACCO RINGSPOT VIRUS CAPSID PROTEIN              |
| 4a6o-A | 3.5 | 3.3  | 82   | 144   | 7   | ALPHA-N-ACETYLGALACTOSAMINIDASE FAMILY PROTEIN     |
| 1gff-2 | 3.5 | 3.3  | 89   | 177   | 9   | BACTERIOPHAGE G4 CAPSID PROTEINS GPF, GPG, GPJ     |
| 1mec-3 | 3.5 | 3.3  | 95   | 231   | 5   | MENGO VIRUS COAT PROTEIN (SUBUNIT VP1)             |
| 1tmf-3 | 3.5 | 3.3  | 96   | 232   | 3   | THEILER'S MURINE ENCEPHALOMYELITIS VIRUS           |
| 1opo-C | 3.5 | 3.4  | 91   | 268   | 12  | COAT PROTEIN                                       |
| 1qqp-2 | 3.5 | 3.4  | 96   | 216   | 11  | PROTEIN (GENOME POLYPROTEIN)                       |
| 1ihm-B | 3.5 | 3.5  | 94   | 511   | 4   | CAPSID PROTEIN                                     |
| 2y26-A | 3.5 | 3.5  | 96   | 504   | 4   | COAT PROTEIN                                       |
| 2ypj-A | 3.5 | 3.6  | 87   | 122   | 2   | ENDOGLUCANASE CEL5A                                |
| 3see-A | 3.4 | 2.7  | 91   | 214   | 2   | HYPOTHETICAL SUGAR BINDING PROTEIN                 |
| 1bev-1 | 3.4 | 3.1  | 89   | 268   | 7   | BOVINE ENTEROVIRUS COAT PROTEINS VP1 TO VP4        |
| 1m06-G | 3.4 | 3.1  | 89   | 187   | 2   | CAPSID PROTEIN                                     |
| 1nzi-B | 3.4 | 3.1  | 75   | 156   | 8   | COMPLEMENT C1S COMPONENT                           |
| 1k5j-A | 3.4 | 3.1  | 76   | 94    | 5   | NUCLEOPLASMIN CORE                                 |
| 1y4w-A | 3.4 | 3.2  | 86   | 517   | 6   | EXO-INULINASE                                      |
| 1f49-A | 3.4 | 3.3  | 89   | 1,021 | 3   | BETA-GALACTOSIDASE                                 |
| 3m8l-A | 3.4 | 3.3  | 92   | 534   | 4   | CAPSID PROTEIN                                     |
| 3ecq-B | 3.4 | 3.3  | 89   | 1,347 | 9   | ENDO-ALPHA-N-ACETYLGALACTOSAMINIDASE               |
| 4dzc-A | 3.4 | 3.3  | 82   | 114   | 7   | PLIG                                               |
| 1ns-A  | 3.4 | 3.3  | 88   | 763   | 3   | X-PROLYL DIPEPTIDYL AMINOPETIDASE                  |
| 2wzr-2 | 3.4 | 3.4  | 94   | 207   | 9   | POLYPROTEIN                                        |
| 3cmg-A | 3.4 | 3.4  | 87   | 661   | 3   | PUTATIVE BETA-GALACTOSIDASE                        |
| 2ii7-B | 3.4 | 3.5  | 79   | 115   | 3   | ANABAENA SENSORY RHODOPSIN TRANSDUCER PROTEIN      |
| 3mo4-A | 3.4 | 3.6  | 88   | 456   | 9   | ALPHA-1,3/4-FUCOSIDASE                             |
| 2qkg-A | 3.4 | 3.6  | 90   | 589   | 3   | INSECTICIDAL DELTA-ENDOTOXIN CRY8EA1               |
| 1xna-A | 3.4 | 3.6  | 88   | 151   | 6   | PROTEIN (DNA-REPAIR PROTEIN XRCC1)                 |
| 4es8-A | 3.4 | 3.7  | 91   | 302   | 5   | EPF                                                |
| 1oq1-A | 3.4 | 3.7  | 93   | 223   | 4   | PROTEIN YESU                                       |
| 1sdd-B | 3.4 | 4    | 88   | 601   | 2   | COAGULATION FACTOR V                               |
| 2r32-A | 3.3 | 2.8  | 71   | 140   | 7   | GCN4-PII/TUMOR NECROSIS FACTOR LIGAND              |
| 1rb8-F | 3.3 | 3.1  | 93   | 422   | 9   | CAPSID PROTEIN                                     |
| 3b7m-A | 3.3 | 3.1  | 91   | 216   | 5   | CELLULASE                                          |
| 3ggl-A | 3.3 | 3.2  | 85   | 161   | 12  | PUTATIVE CHITOBIASE                                |
| 1d2q-A | 3.3 | 3.2  | 85   | 134   | 8   | TNF-RELATED APOPTOSISINDUCING LIGAND               |
| 3cji-B | 3.3 | 3.3  | 93   | 238   | 8   | POLYPROTEIN                                        |
| 1rud-1 | 3.3 | 3.3  | 83   | 273   | 7   | RHINOVIRUS 14                                      |
| 1c8n-C | 3.3 | 3.4  | 95   | 219   | 5   | COAT PROTEIN                                       |
| 1h8t-B | 3.3 | 3.4  | 96   | 252   | 4   | ECHOVIRUS 11 COAT PROTEIN VP1                      |
| 4ag4-A | 3.3 | 3.4  | 86   | 340   | 0   | EPITHELIAL DISCOIDINDOMAIN-CONTAINING RECEPTOR 1   |
| 3ut0-A | 3.3 | 3.5  | 95   | 804   | 9   | EXO-1,3/1,4-BETA-GLUCANASE                         |
| 1al0-G | 3.3 | 3.5  | 95   | 175   | 7   | SCAFFOLDING PROTEIN GPD                            |
| 1tnv-B | 3.3 | 3.5  | 93   | 186   | 0   | TOBACCO NECROSIS VIRUS (SUBUNIT VP1)               |
| 1yjl-A | 3.3 | 3.6  | 84   | 285   | 7   | PEPTIDYL-GLYCINE ALPHA-AMIDATING MONOOXYGENASE     |
| 2r0f-A | 3.3 | 3.7  | 87   | 163   | 5   | CGL3 LECTIN                                        |
| 1xpw-A | 3.3 | 3.7  | 80   | 143   | 6   | LOC51668 PROTEIN                                   |
| 4gz9-A | 3.2 | 3    | 80   | 562   | 6   | NEUROFILIN-1                                       |
| 1k3i-A | 3.2 | 3.1  | 81   | 651   | 7   | GALACTOSE OXIDASE PRECURSOR                        |
| 1poq-A | 3.2 | 3.1  | 79   | 118   | 5   | YPM                                                |
| 2y38-A | 3.2 | 3.2  | 84   | 341   | 8   | LAMININ SUBUNIT ALPHA-5                            |
| 1spp-A | 3.2 | 3.2  | 74   | 109   | 5   | MAJOR SEMINAL PLASMA GLYCOPROTEIN PSP-1            |
| 2yue-A | 3.2 | 3.2  | 87   | 168   | 3   | PROTEIN NEURALIZED                                 |
| 2fnj-A | 3.2 | 3.3  | 92   | 217   | 5   | CG2944-PF, ISOFORM F                               |

**Table S1. Cont.**

| Chain  | Z   | rmsd | lali | Nres | %id | Description                                    |
|--------|-----|------|------|------|-----|------------------------------------------------|
| 4h7m-A | 3.2 | 3.3  | 91   | 226  | 5   | ENDO-1,4-BETA-GLUCANASE                        |
| 1z7s-3 | 3.2 | 3.3  | 94   | 239  | 3   | HUMAN COXSACKIEVIRUSA21                        |
| 3iyp-C | 3.2 | 3.4  | 97   | 252  | 4   | CAPSID PROTEIN                                 |
| 1cov-3 | 3.2 | 3.4  | 97   | 238  | 3   | COXSACKIEVIRUS COAT PROTEIN                    |
| 1ev1-2 | 3.2 | 3.4  | 98   | 254  | 5   | ECHOVIRUS 1                                    |
| 3vbf-B | 3.2 | 3.4  | 96   | 245  | 7   | GENOME POLYPROTEIN, CAPSID PROTEIN VP1         |
| 1eah-2 | 3.2 | 3.4  | 97   | 262  | 6   | POLIOVIRUS TYPE 2 COAT PROTEINS VP1 TO VP4     |
| 1qkq-A | 3.2 | 3.5  | 78   | 141  | 3   | EOSINOPHIL LYSOPHOSPHOLIPASE                   |
| 1mqt-B | 3.2 | 3.5  | 98   | 254  | 4   | POLYPROTEIN                                    |
| 3skv-A | 3.2 | 3.5  | 78   | 354  | 8   | SSFX3                                          |
| 4fy1-1 | 3.2 | 3.7  | 97   | 217  | 8   | CAPSID PROTEIN                                 |
| 1ncq-A | 3.2 | 3.7  | 91   | 273  | 8   | COAT PROTEIN VP1                               |
| 3sam-B | 3.2 | 3.8  | 82   | 544  | 2   | RIFAMPICIN RESISTANCEPROTEIN                   |
| 1auy-B | 3.2 | 4.4  | 96   | 189  | 4   | TURNIP YELLOW MOSAICVIRUS                      |
| 4g3y-C | 3.1 | 2.9  | 76   | 147  | 9   | INFLIXIMAB FAB L                               |
| 4rhv-1 | 3.1 | 3.3  | 88   | 273  | 9   | HUMAN RHINOVIRUS 14 C                          |
| 3frl-B | 3.1 | 3.3  | 91   | 232  | 2   | LIPL32                                         |
| 1bzw-A | 3.1 | 3.3  | 95   | 232  | 3   | PROTEIN (PEANUT LECTIN)                        |
| 1lgn-A | 3.1 | 3.3  | 86   | 204  | 10  | SERUM AMYLOID P COMPONENT                      |
| 1o59-A | 3.1 | 3.4  | 83   | 318  | 10  | ALLANTOICASE                                   |
| 2zah-C | 3.1 | 3.4  | 94   | 331  | 6   | COAT PROTEIN                                   |
| 2gh8-A | 3.1 | 3.5  | 89   | 544  | 8   | CAPSID PROTEIN                                 |
| 1o8p-A | 3.1 | 3.5  | 81   | 131  | 7   | PUTATIVE ENDO-XYLANASE                         |
| 4dy5-A | 3.1 | 3.6  | 75   | 111  | 9   | GIFS-1 PROPHAGE PROTEIN                        |
| 3iii-A | 3.1 | 3.8  | 86   | 556  | 5   | COCE/NOND FAMILY HYDROLASE                     |
| 3kb5-A | 3.1 | 3.8  | 89   | 193  | 7   | TRIPARTITE MOTIF-CONTAINING PROTEIN 72         |
| 3kq4-B | 3   | 2.9  | 74   | 457  | 11  | GASTRIC INTRINSIC FACTOR                       |
| 1ovp-A | 3   | 2.9  | 71   | 114  | 3   | HYPOTHETICAL PROTEINLECB                       |
| 3nv1-A | 3   | 3    | 75   | 136  | 1   | GALECTIN 9 SHORT ISOFORM VARIANT               |
| 1vbc-3 | 3   | 3.2  | 92   | 235  | 4   | POLIOVIRUS TYPE 3                              |
| 2wzp-P | 3   | 3.3  | 77   | 298  | 6   | PUTATIVE RECEPTOR BINDING PROTEIN              |
| 2w0c-L | 3   | 3.5  | 102  | 335  | 7   | MAJOR CAPSID PROTEINP2                         |
| 3k94-B | 3   | 3.5  | 72   | 216  | 1   | THIAMIN PYROPHOSPHOKINASE                      |
| 3a0n-A | 3   | 3.5  | 93   | 242  | 5   | VAL-1                                          |
| 2tbv-C | 3   | 3.6  | 95   | 320  | 4   | TOMATO BUSHY STUNT VIRUS                       |
| 4dmi-B | 3   | 3.7  | 75   | 169  | 11  | CAPSID PROTEIN                                 |
| 1qjz-B | 3   | 3.7  | 94   | 188  | 5   | PHYSALIS MOTTLE VIRUS                          |
| 2okx-B | 3   | 3.7  | 86   | 954  | 2   | RHAMNOSIDASE B                                 |
| 2v73-A | 3   | 3.8  | 92   | 183  | 4   | PUTATIVE EXO-ALPHA-SIALIDASE                   |
| 2fbe-C | 3   | 3.9  | 88   | 199  | 11  | PREDICTED: SIMILAR TORET FINGER PROTEIN-LIKE 1 |
| 1p30-A | 3   | 4.1  | 91   | 891  | 4   | HEXON PROTEIN                                  |

A nonredundant list of the top DALI hits above 3.0 for gp10 are shown. "Chain" represents the four letter PDB ID and associated chain ID, "Z" is the DALI Z-score, "rmsd" is the root mean squared deviation between gp10 and the DALI hit over the aligned residues ("lali"). The sequence identity of the aligned residues is shown in the "%id" column; total domain length for the DALI hit is shown in the "nres" column. A short description of the hit is listed under the "Description" column.

**Table S2. Potential salt bridges**

| gp7     | gp7    | gp10   | Location          | Density observed |
|---------|--------|--------|-------------------|------------------|
| Ser10   | —      | Lys2   | N-arm             | +++              |
| Lys20   | Asp48  | —      | N-arm:F-loop      | +++              |
| Lys33   | Asp232 | —      | N-arm:A-domain    | ++               |
| Lys51   | —      | Asp107 | F-loop            | +++              |
| Arg57   | Glu113 | —      | E-loop:long helix | +++              |
| Glu62   | Lys124 | —      | E-loop:long helix | +                |
| Arg66   | Asp96  | —      | E-loop:P-domain   | —                |
| Arg102  | Asp225 | —      | P-domain:P-domain | —                |
| Asp135  | —      | Arg41  | A-domain          | +++              |
| His199  | Glu200 | —      | P-domain:P-domain | —                |
| Arg216  | Glu221 | —      | P-domain:P-domain | +++              |
| Asp263  | Lys292 | —      | A-domain:A-domain | —                |
| Asp269  | Lys284 | —      | A-domain:A-domain | —                |
| Glu-305 | Lys310 | —      | A-domain          | +++              |

A list of potential salt bridges was identified using PDBe PISA webserver. Residues for the relevant gp7 and gp10 subunits are indicated. A general location is given for the interaction (relative to gp10 in the case of gp7–gp10 interactions). Interactions across capsomeres are highlighted in red text in the location column. Visible density at the potential salt bridge locations is indicated with a rank for “–” (no density present) to “+++” where clear density is seen.
